# Supplementary material
Source: PubMed Central journal article supplement (PMC2806727)
Supplement: 0907739107_pnas.200907739SI.pdf [file 0907739107_pnas.200907739SI.pdf]

# Supporting Information

Siebold et al. 10.1073/pnas.0907739107

## Western Analysis of RPD3 and SIR2 Levels in S2 Cells After *E(z)* RNAi Knockdown RNAi.

Double-stranded RNAs (dsRNA) corresponding to portions of the *E(z)* mRNA were generated as previously described (1). *E(z)* RNAi knockdown in *Drosophila* S2 cells was done as previously described (2). *Drosophila* S2 cells were directly resuspended in one volume of the whole extraction buffer (8 M urea, 4.0% CHAPS, 40 mM Tris, pH 7.4) and one volume of 2× SDS sample

buffer in a final concentration of  $0.5\sim 1 \times 10^5$  cells/ $\mu$ L. The mixture was heated to 95 °C for 5–10 min and 5–10  $\mu$ L was used for Western blots on 8% SDS/PAGE with 0.2  $\mu$ m pore size nitrocellulose membrane. Various antibodies against E(Z), RPD3, SIR2, and  $\beta$ -tubulin (loading control) were used at dilutions ranging from 1:250–1:2000. Secondary antibodies used were conjugated to Cy5 and images were captured using the Typhoon Trio Variable Mode Imager (GE Healthcare).

1. Kurzahls RL, Tie F, Stratton CA, Harte PJ (2008) *Drosophila* ESC-like can substitute for ESC and becomes required for Polycomb silencing if ESC is absent. *Dev Biol* 313: 293–306.

2. Tie F, Stratton CA, Kurzahls RL, Harte PJ (2007) The N terminus of *Drosophila* ESC binds directly to histone H3 and is required for E(Z)-dependent trimethylation of H3 lysine 27. *Mol Cell Biol* 27:2014–2026.

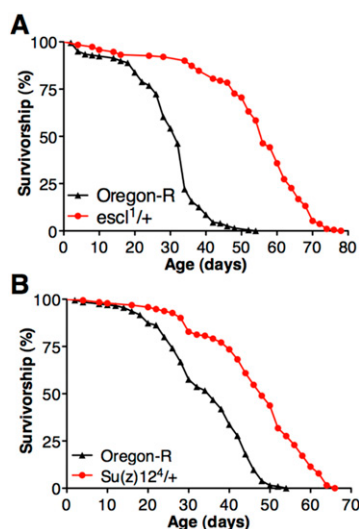

**Fig. S1.** Mutations in other PRC2 subunits, *escl* and *Su(z)12*, extend life span when out-crossed to O-R. Male flies heterozygous for the hypomorphic *escl*<sup>1</sup> allele (A) or the genetic null allele *Su(z)12*<sup>2</sup> (B) were out-crossed to O-R wild-type flies. *escl*<sup>1/+</sup> mutants live 88% longer than O-R ( $P < 0.001$ ; O-R  $n = 199$ ; *escl*<sup>1</sup>  $n = 190$ ) and *Su(z)12*<sup>2/+</sup> mutants live 41% longer than O-R (O-R  $n = 205$ , *Su(z)12*<sup>2</sup>  $n = 192$   $P < 0.001$ ). Life span assays in A and B were conducted independently at 25 °C with constant humidity (approximately 50%). Reported  $P$  values shown are from Mantel-Cox log-rank statistical analysis.

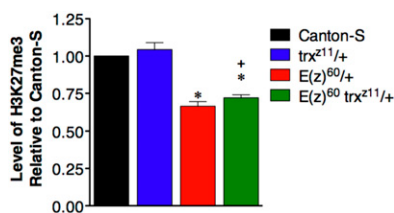

**Fig. S2.** A hypomorphic *trithorax* allele increases the H3K27me3 level of *E(z)* mutants less than the null allele. Quantitative western analysis was done from age-matched adult males out-crossed to C-S. *E(z)*<sup>60/+</sup> mutants have 35% less H3K27me3 than C-S, as shown previously in Fig. 4B. *trx*<sup>211/+</sup> mutants increase H3K27me3 only 4% compared to C-S (not statistically significant). *E(z)*<sup>60</sup> *trx*<sup>211/+</sup> + double mutants have 6% more H3K27me3 than *E(z)*<sup>60/+</sup> mutants. The C-S control value was arbitrarily set to 1 in each experimental replicate. The normalized means are plotted with S.E.M (error bars). T-tests were performed to test for statistical significance. “\*\*” indicates  $P \leq 0.05$  compared to C-S. “+” indicates  $P \leq 0.05$  compared to *E(z)*<sup>60/+</sup>.

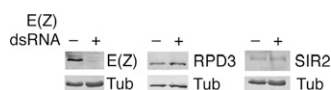

**Fig. S3.** RPD3 and SIR2 protein levels were unchanged after stringent RNAi knockdown of *E(z)* in S2 cells. No E(Z) protein was detectable following the RNAi treatment.  $\beta$ -tubulin (Tub) was used as a loading control for each protein examined.
